# Supplementary material for: Purification and Characterization of a Novel α-L-Rhamnosidase from Papiliotrema laurentii ZJU-L07 and Its Application in Production of Icariin from Epimedin C
Source: MDPI journal article supplement (doi:10.3390/jof8060644), 2022-06-20
Supplement: s1 [file s1]

## Supplementary File 1

### 1. Materials and Methods

The calculation method of icariin yield and epimedin C is as follows.

$$\text{Icariin Yield (\%)} = \frac{\Delta m \times Mr_1}{m_1 \times Mr_2} \times 100$$

$$\text{Epimedin C remained (\%)} = \frac{m_2}{m_1} \times 100$$

$\Delta m$ : Mass difference of icariin before and after reaction.

$m_1$ : The quality of epimedin C before the reaction.

$m_2$ : The quality of epimedin C after the reaction.

$Mr_1$ : Relative molecular mass of epimedin C.

$Mr_2$ : Relative molecular mass of icariin.

### 2. Results

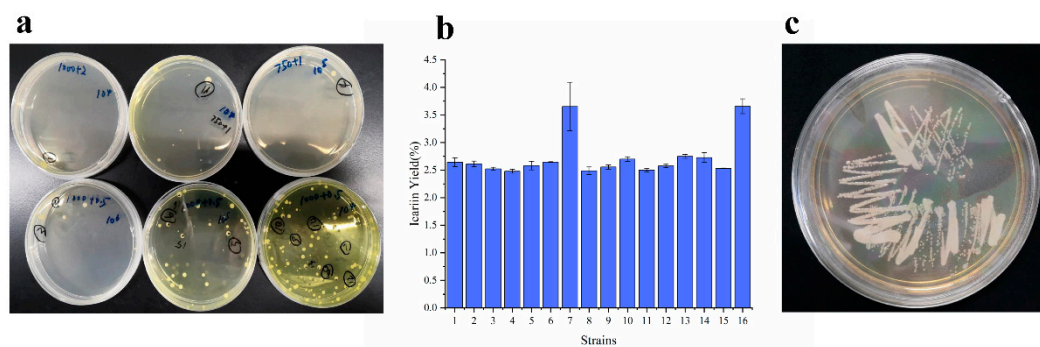

**Figure S1 Strain screening results after mutagenesis for producing  $\alpha$ -L-rhamnosidase transforming epimedin C. (a) Strains on LB medium including pNPR, (b) Icariin Yield, (c) The morphology of *P. laurentii* ZJU-L07 on YPD medium**

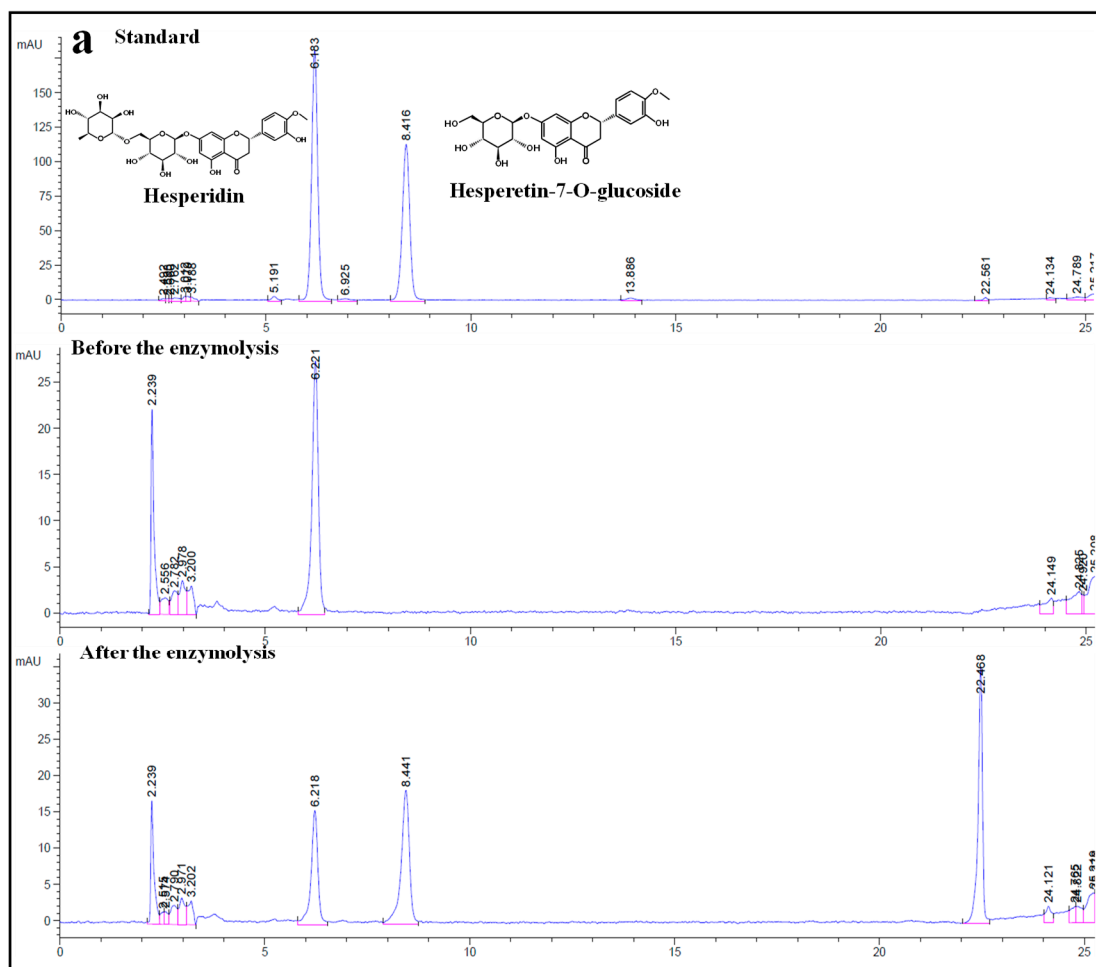

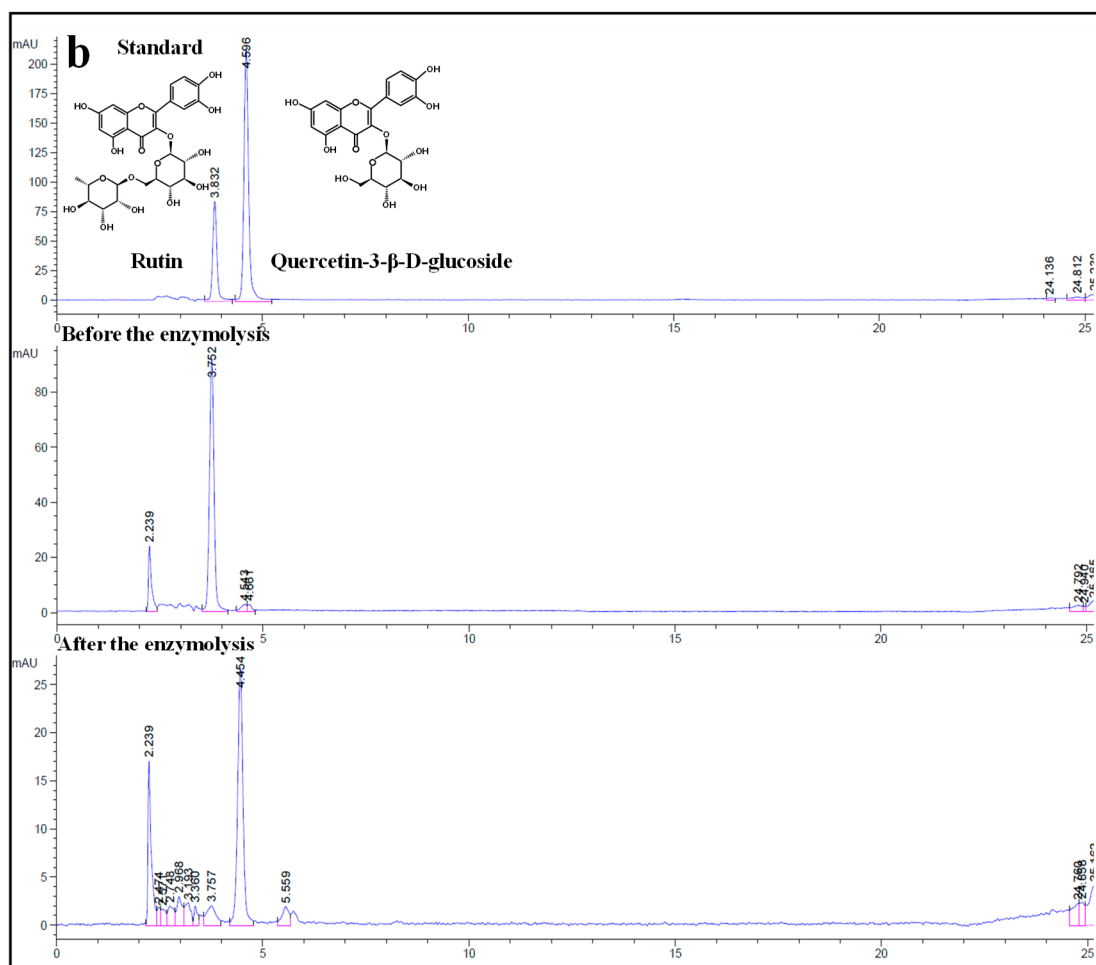

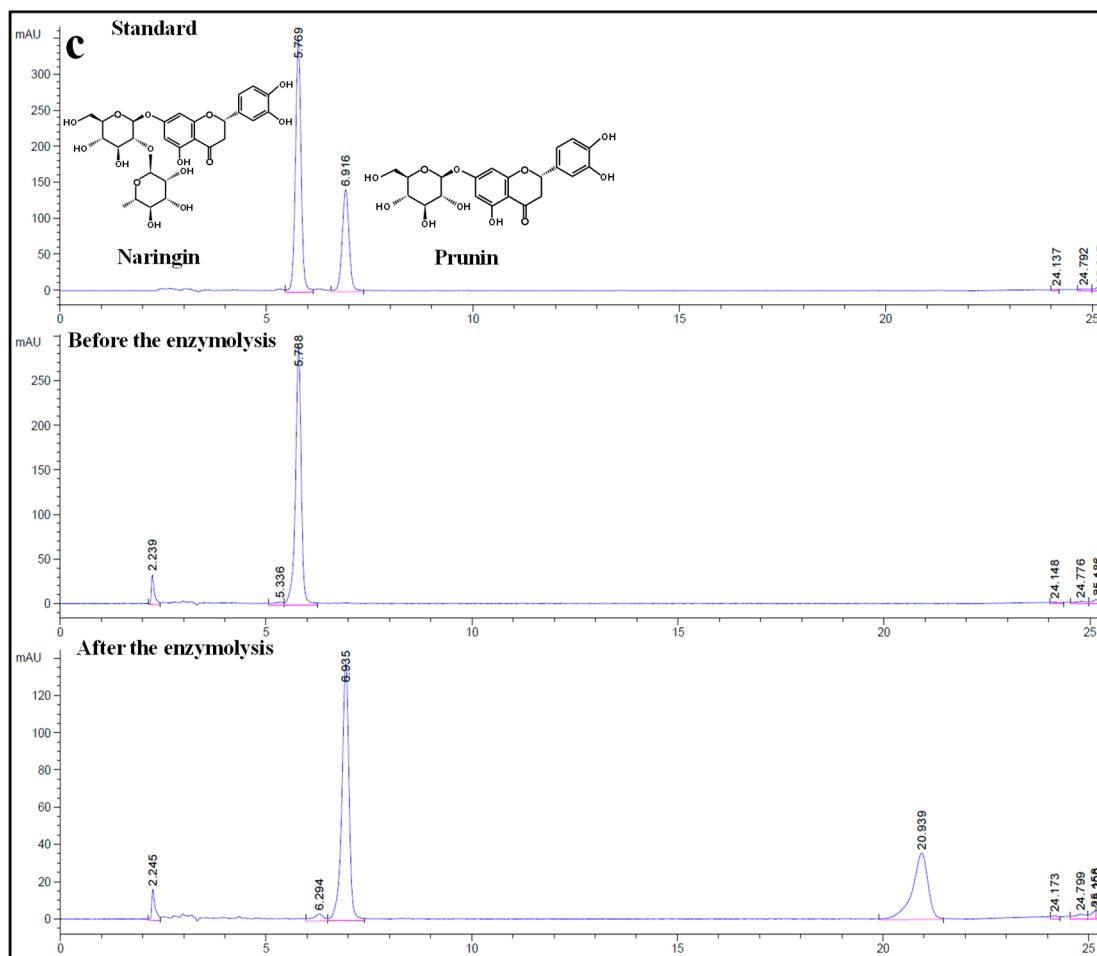

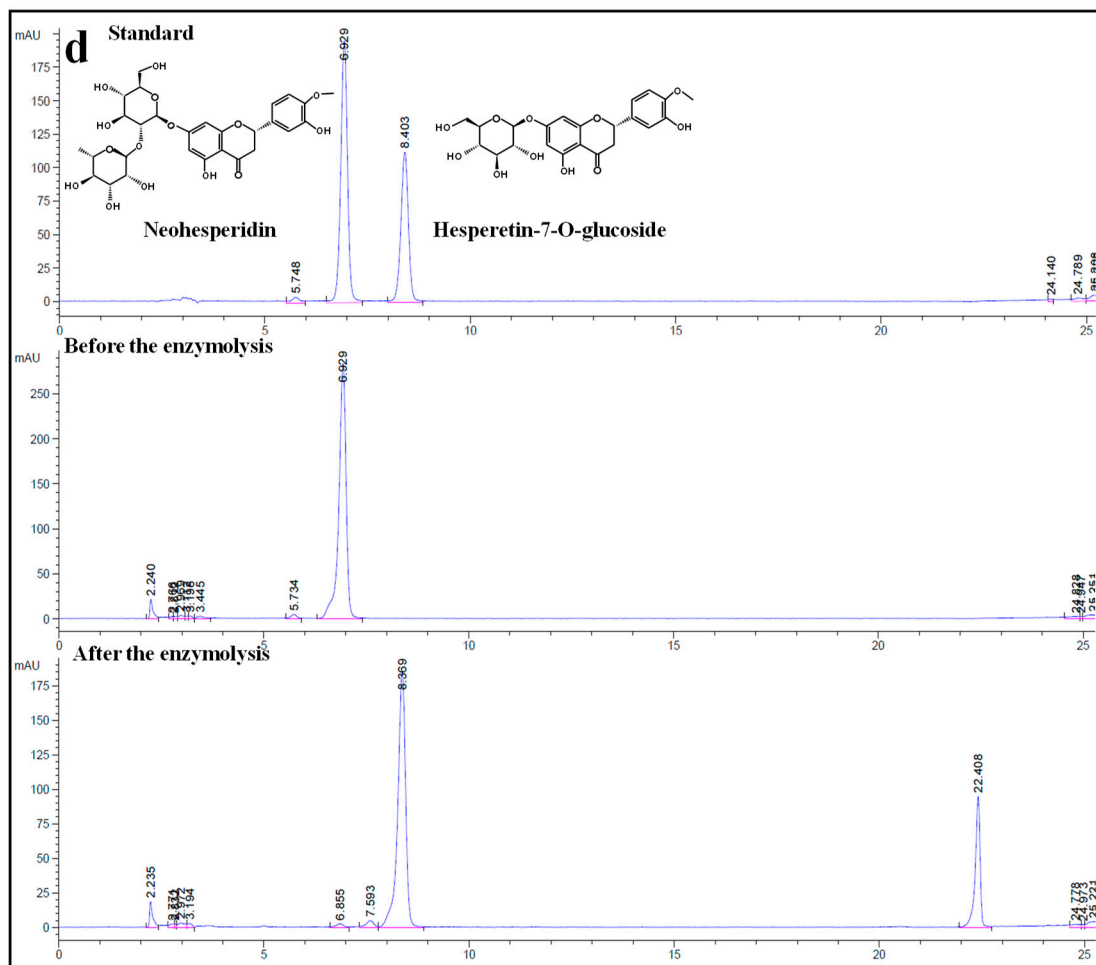

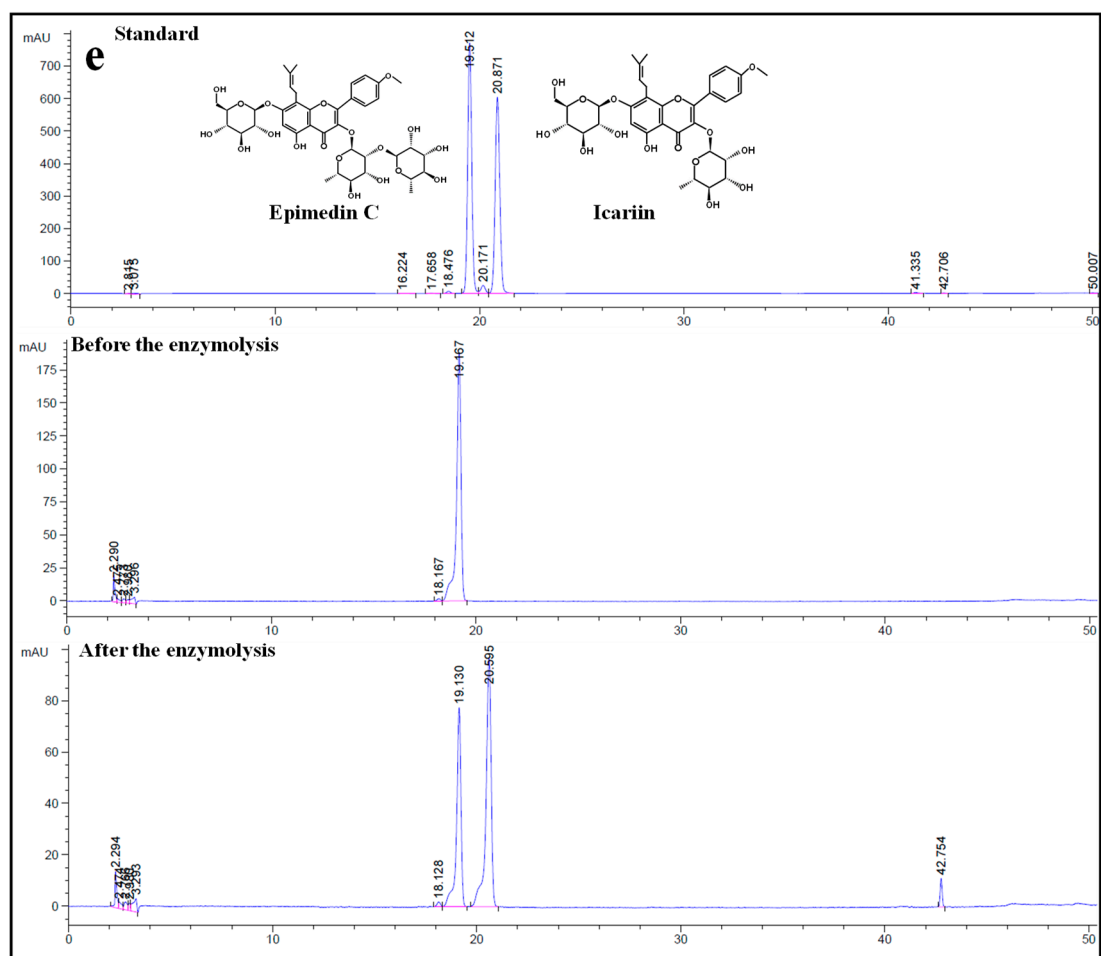

**Figure S2 Chromatographs of the reaction mixtures before and after enzymatic hydrolysis of hesperidin(a), rutin(b), naringin(c), neohesperidin(d) and epimedin C(e).**

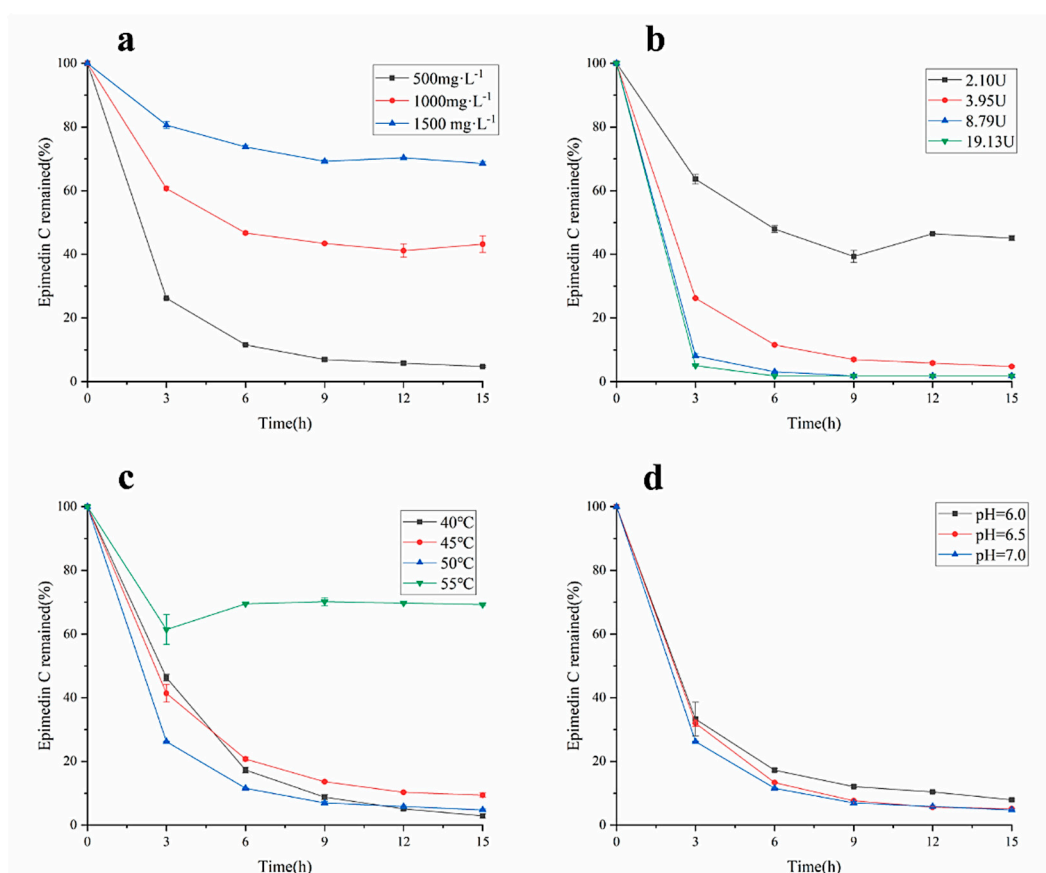

**Figure S3 Enzymatic hydrolysis of EWE-II. (a) The amount of  $\alpha$ -L-rhamnosidase on Epimedin C remained at 50 °C under pH 4.0 with 3.95 U of enzyme. (b) The amount of  $\alpha$ -L-rhamnosidase on Epimedin C remained at 50 °C under pH 4.0 with 500 mg·L<sup>-1</sup> epimedin C. (c) Temperature affection with 3.95U of enzyme in the reaction system containing 500 mg·L<sup>-1</sup> epimedin C at pH 7.0. (d) pH affection with 3.95U of enzyme in the reaction system containing 500 mg·L<sup>-1</sup> epimedin C at 50 °C.**

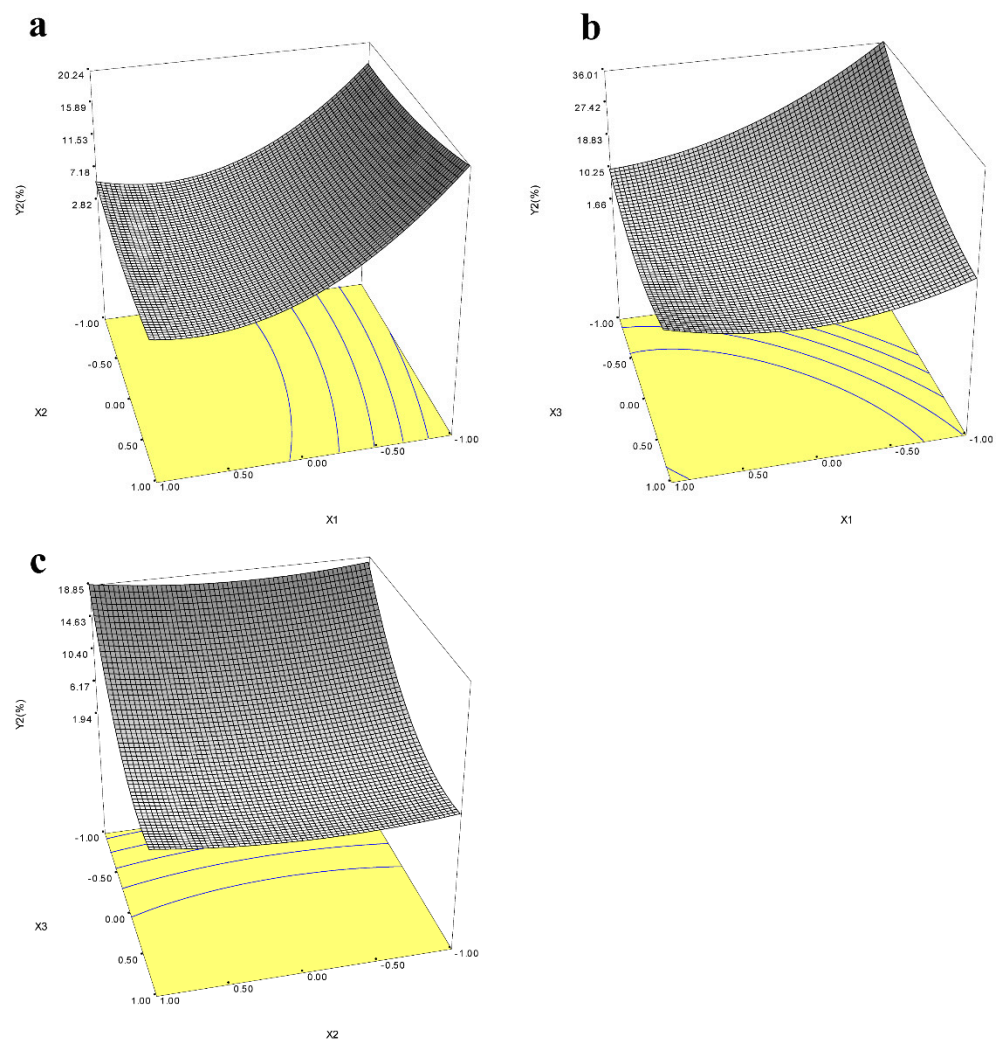

**Figure S4** Response surface map of enzyme dosage ( $X_1$ ), pH ( $X_2$ ) and time ( $X_3$ ) for Epimedin C remained ( $Y_2$ ). Response surface maps of the interaction of enzyme activity ( $X_1$ ) and pH ( $X_2$ ) (a), enzyme activity ( $X_1$ ) and hydrolysis time ( $X_3$ ) (b), and pH ( $X_2$ ) and hydrolysis time ( $X_3$ ) (c) on Epimedin C remained ( $Y_2$ ). The coordinate  $X$  represents the code value, not the actual value.

**Table S1 ANOVA of the quadratic model for Epimedin C remained**

| Source           | Sum of   | Degree of | Mean     | F- Value | p-value         | Remarks            |
|------------------|----------|-----------|----------|----------|-----------------|--------------------|
|                  | Squares  | freedom   | Square   |          | Probability > F |                    |
| Model            | 1256.579 | 9         | 139.620  | 22.529   | 0.0002          | significant        |
| $X_1$            | 392.305  | 1         | 392.3052 | 63.302   | < 0.0001        |                    |
| $X_2$            | 1.586    | 1         | 1.586    | 0.256    | 0.628           |                    |
| $X_3$            | 458.441  | 1         | 458.441  | 73.973   | < 0.0001        |                    |
| $X_1^2$          | 135.017  | 1         | 135.017  | 21.786   | 0.0023          |                    |
| $X_2^2$          | 5.220    | 1         | 5.220    | 0.842    | 0.389           |                    |
| $X_3^2$          | 96.122   | 1         | 96.122   | 15.510   | 0.006           |                    |
| $X_1 \times X_2$ | 4.195    | 1         | 4.195    | 0.677    | 0.438           |                    |
| $X_1 \times X_3$ | 144.090  | 1         | 144.090  | 23.250   | 0.002           |                    |
| $X_2 \times X_3$ | 0.009    | 1         | 0.009    | 0.0014   | 0.971           |                    |
| Residual         | 43.382   | 7         | 6.197    |          |                 |                    |
| Lack of Fit      | 35.702   | 3         | 11.901   | 6.199    | 0.055           | not<br>significant |
| Pure Error       | 7.679    | 4         | 1.920    |          |                 |                    |
| Cor Total        | 1299.961 | 16        |          |          |                 |                    |
